# Supplementary material for: Convective self-assembly of π-conjugated oligomers and polymers
Source: Royal Society of Chemistry journal article supplement (doi:10.1039/c7tc00063d), 2017-01-01
Supplement: c7tc00063d1.pdf [file c7tc00063d1.pdf]

**Supplementary Information of:**

**Convective self-assembly of  $\pi$ -conjugated oligomers and polymers**

*Ioan Botiz<sup>a,b,\*</sup>, Marius-Andrei Codescu<sup>a</sup>, Cosmin Farcau<sup>a</sup>, Cosmin Leordean<sup>a,c</sup>, Simion Astilean<sup>a,d</sup>, Carlos Silva<sup>e</sup>, Natalie Stingelin<sup>b,f</sup>*

<sup>a</sup>Nanobiophotonics and Laser Microspectroscopy Center, Interdisciplinary Research Institute in Bio-Nano-Sciences, Babes-Bolyai University, Treboniu Laurian nr. 42, Cluj-Napoca 400271, Romania; <sup>b</sup>Department of Materials and Centre for Plastic Electronics, Imperial College London, Exhibition Road, London, SW7 2AZ, UK; <sup>c</sup>Robert Bosch SRL, Robert Bosch nr. 1, Jucu 407352, Romania; <sup>d</sup>Department of Biomolecular Physics, Faculty of Physics, Babes-Bolyai University, M Kogalniceanu Str. 1, 400084 Cluj-Napoca, Romania; <sup>e</sup>School of Chemistry & Biochemistry and School of Physics, Georgia Institute of Technology, Atlanta, Georgia 30332, USA; <sup>f</sup>School of Materials Science and Engineering and School of Chemical & Biomolecular Engineering, Georgia Institute of Technology, Atlanta, Georgia 30332, USA. \*E-Mail: ioan.botiz@ubbcluj.ro

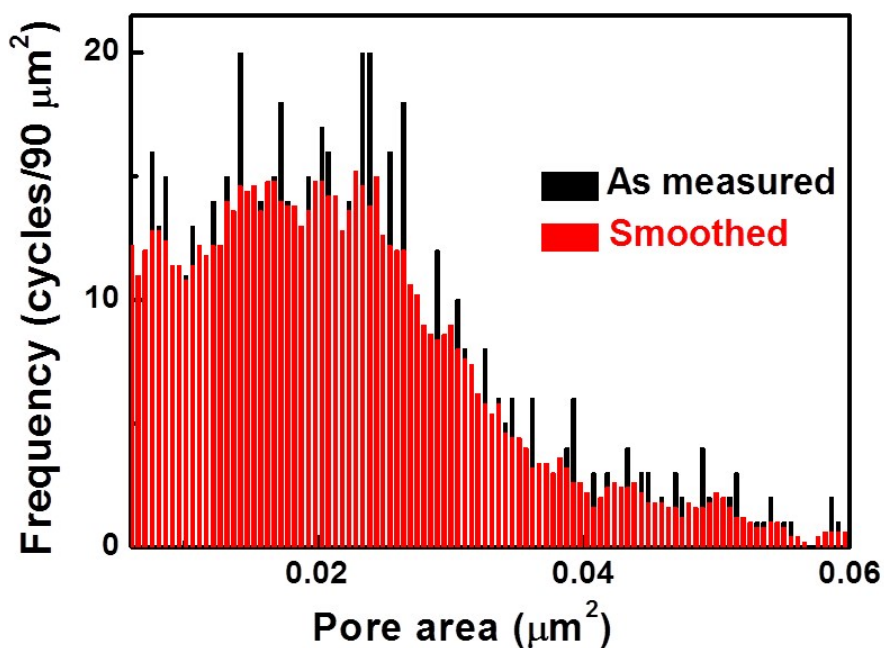

**Figure S1.** Power spectral density obtained from analysis of the microstructure of  $\text{TH}_{13}$  film obtained using a CSA deposition speed of  $500 \mu\text{m/s}$ .

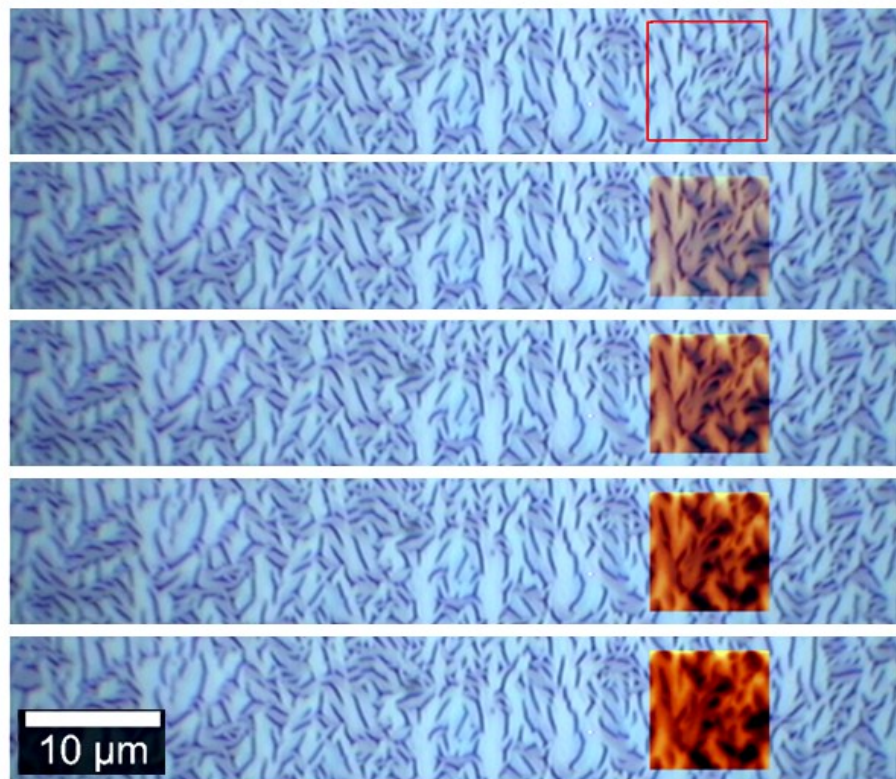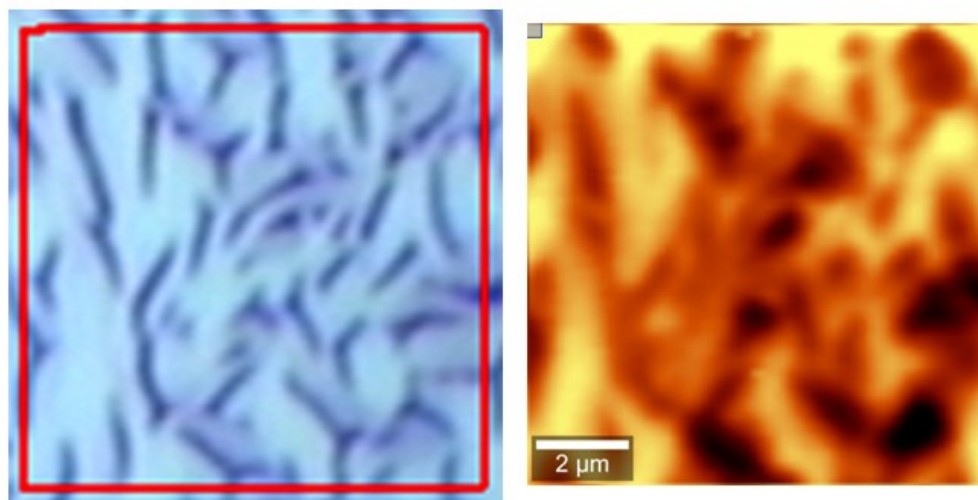

**Figure S2.** Superposition of polarized PL on the corresponding optical micrograph taken for the sample presented in Figure S3 right (top). A zoom-in of the superposition is also shown (bottom).

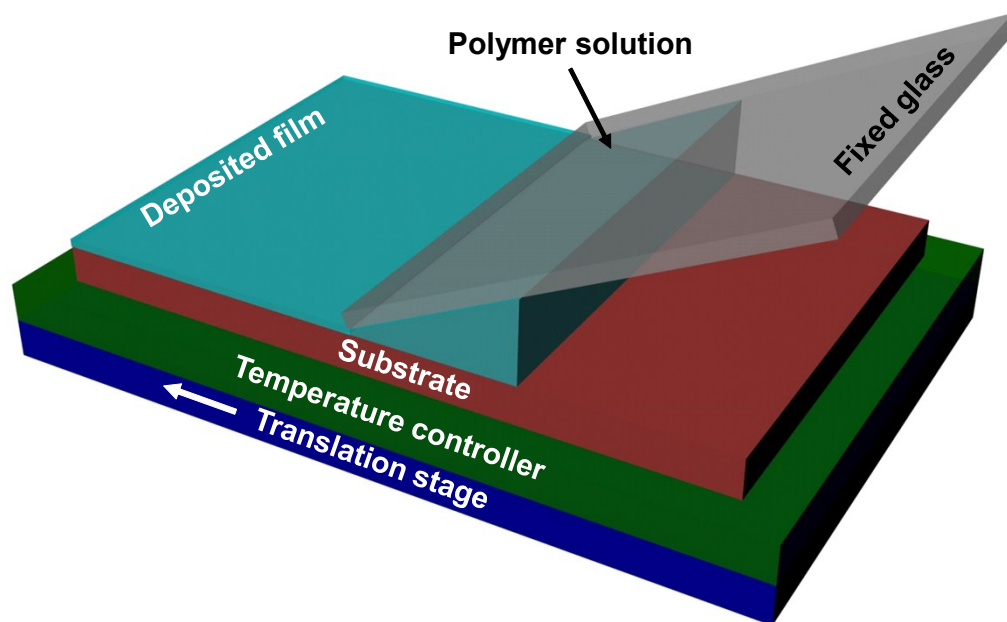

**Figure S3.** Schematics depicting the CSA setup as adapted for polymer deposition on solid substrates.
